# Supplementary material for: Flexible hierarchical membranes of WS2nanosheets grown on graphene-wrapped electrospun carbon nanofibers as advanced anodes for highly reversible lithium storage
Source: Royal Society of Chemistry journal article supplement (doi:10.1039/c6nr04241d), 2016-01-01
Supplement: c6nr04241d1.pdf [file c6nr04241d1.pdf]

## Electronic Supplementary Information

### Flexible hierarchical membranes of WS<sub>2</sub> nanosheets grown on graphene-wrapped electrospun carbon nanofibers as advanced anodes for highly reversible lithium storage

Longsheng Zhang,<sup>b</sup> Wei Fan<sup>\*a</sup> and Tianxi Liu<sup>\*a,b</sup>

**Fig. S1** FESEM image of the CNF membrane at low magnification, showing its three-dimensional nanofiber network with porous structures and large surface area.

**Fig. S2** Cross-sectional FESEM images of the GCNF membrane at different magnifications. As indexed in (d), carbon nanofibers in the internal portion of GCNF membranes are wrapped by conductive graphene sheath.

**Fig. S3** TEM images of GO sheets, showing that GO sheets are thin, a few microns in size and slightly scrolled on sheet edges.

**Fig. S4** AFM image and the corresponding height profile of GO sheets, verifying that the thickness of single-layered GO sheets is about 1.0~1.1 nm.

**Fig. S5** FESEM images of (a, c) WS<sub>2</sub>/GCNF-1 and (b, d) WS<sub>2</sub>/GCNF-3 hybrid membranes at low and high magnifications, respectively.

**Fig. S6** TGA curves of WS<sub>2</sub>, GCNF and WS<sub>2</sub>/GCNF hybrid membranes.

**Fig. S7** (a) Nitrogen adsorption/desorption isotherms of bare WS<sub>2</sub> powder and WS<sub>2</sub>/GCNF-2 membrane. (b) The pore size distribution of WS<sub>2</sub>/GCNF-2 membrane.

The WS<sub>2</sub> sample shows reversible type II isotherms while the WS<sub>2</sub>/GCNF-2 sample exhibits type IV isotherms with a typical H2 hysteresis loop, indicating WS<sub>2</sub> powder as non-porous materials and WS<sub>2</sub>/GCNF-2 membrane as mesoporous materials.

**Fig. S8** Morphology of the WS<sub>2</sub>/CNF hybrid membrane prepared *via* the same solvothermal method, without graphene sheath wrapping the carbon nanofibers. FESEM images of (a) WS<sub>2</sub>/CNF-1, (b) WS<sub>2</sub>/CNF-2 and (c) WS<sub>2</sub>/CNF-3 hybrid membranes at low magnification. (d) FESEM image of WS<sub>2</sub>/CNF-2 hybrid membrane at high magnification.

**Fig. S9** FESEM images of the as-prepared WS<sub>2</sub> sample without adding CNF or GCNF membranes.

**Fig. S10** High resolution C 1s spectra of (a) WS<sub>2</sub>/GCNF-2 hybrid membrane and (b) GO sheets, confirming that most of the oxygen-containing functional groups (-C-O and -C=O groups) of the graphene sheets in WS<sub>2</sub>/GCNF-2 hybrid membrane are removed after the thermal reduction process.

**Fig. S11** Comparison of the electrochemical performance of WS<sub>2</sub>/GCNF-1, WS<sub>2</sub>/GCNF-2 and WS<sub>2</sub>/GCNF-3 anodes at constant current density of 0.1 A g<sup>-1</sup>.

**Fig. S12** Cycling performance of CNF, WS<sub>2</sub>/CNF-1, WS<sub>2</sub>/CNF-2 and WS<sub>2</sub>/CNF-3 anodes at constant current density of 0.1 A g<sup>-1</sup>.

**Fig. S13** Columbic efficiency of the WS<sub>2</sub>/GCNF-2 hybrid membrane during the galvanostatic discharge-charge process.

**Fig. S14** The post-mortem FESEM images of WS<sub>2</sub>/GCNF-2 hybrid membrane after 100 cycles of discharge-charge tests.

**Fig. S15** Nyquist plots of the WS<sub>2</sub> and WS<sub>2</sub>/GCNF-2 electrode after 10 cycles.

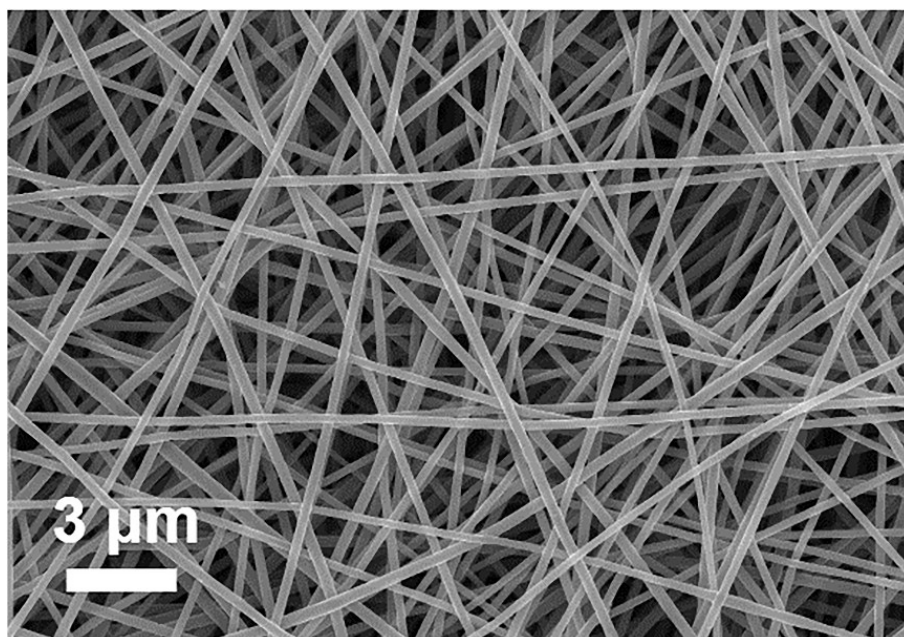

**Fig. S1**

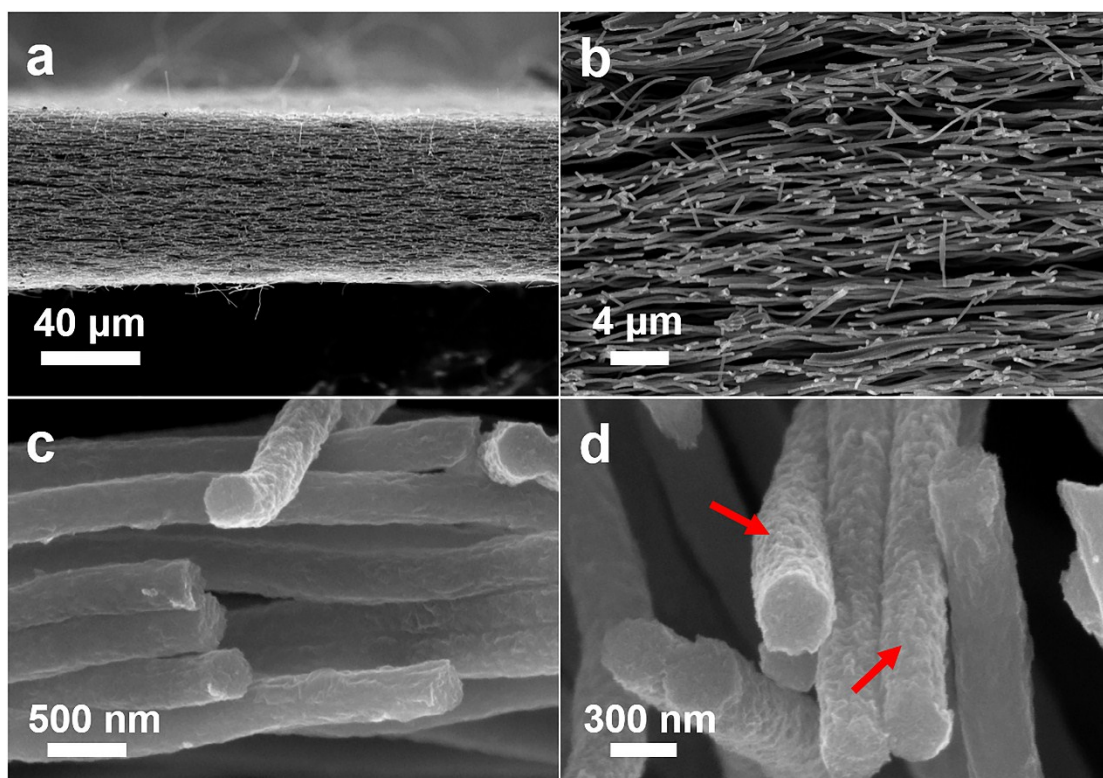

**Fig. S2**

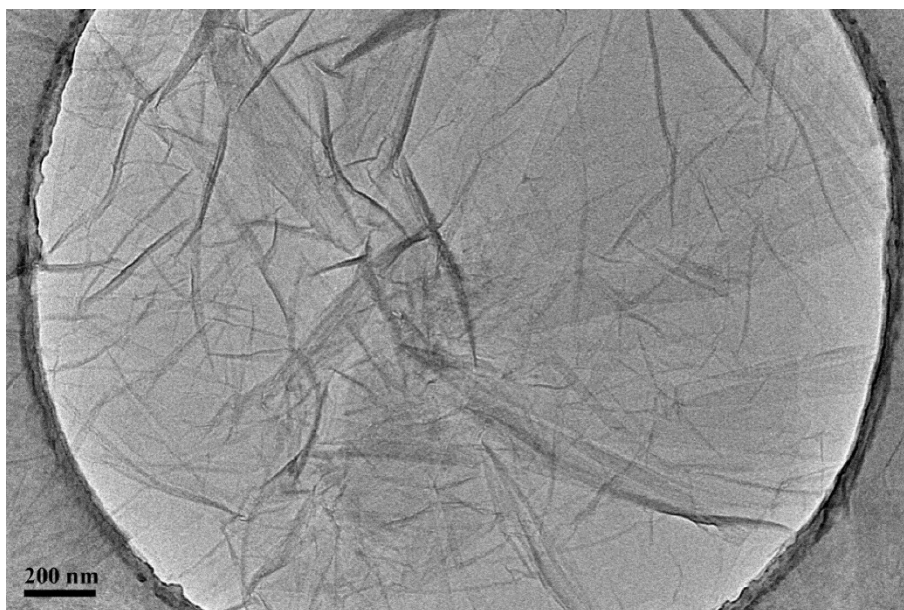

**Fig. S3**

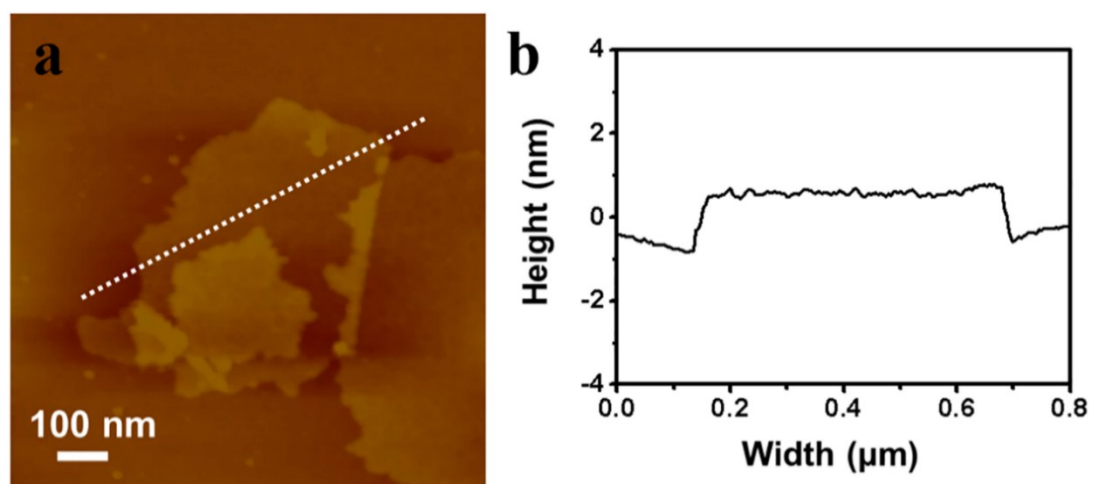

**Fig. S4**

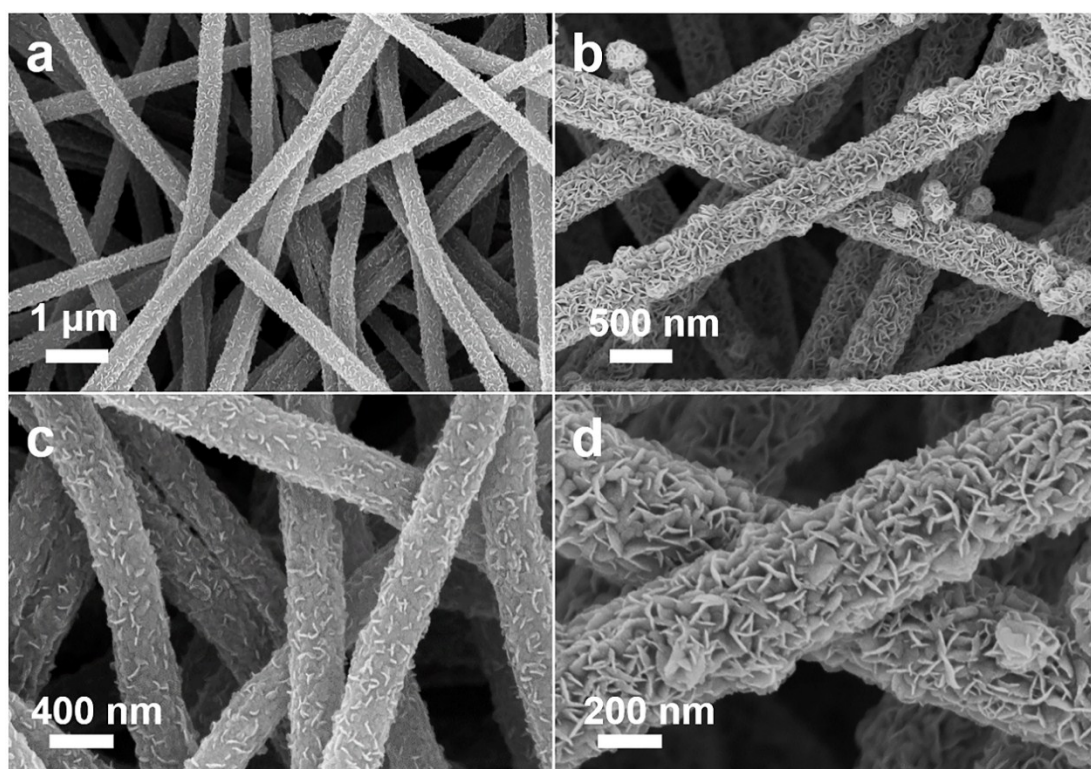

**Fig. S5**

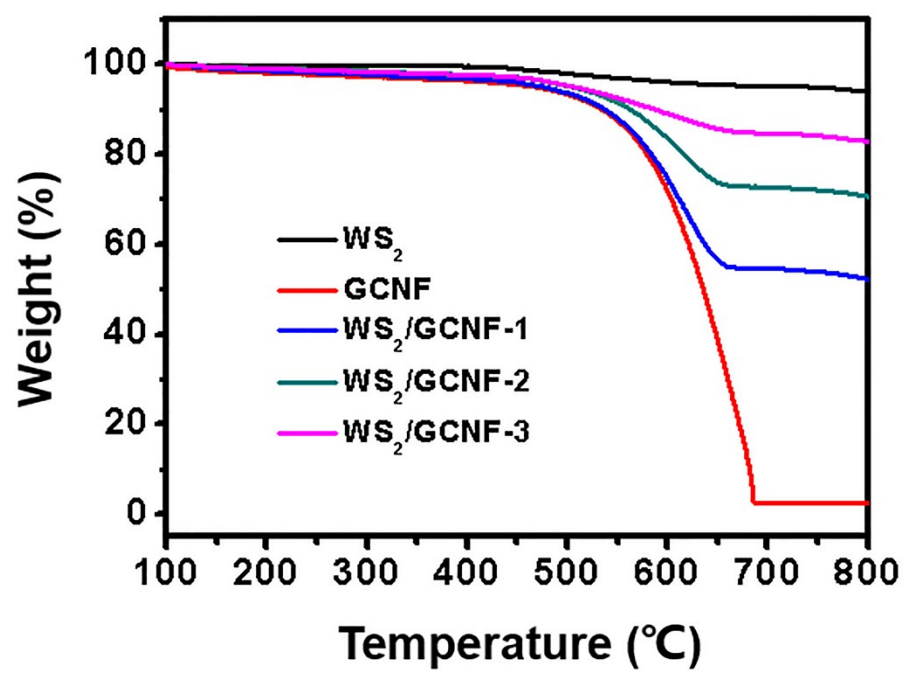

Fig. S6

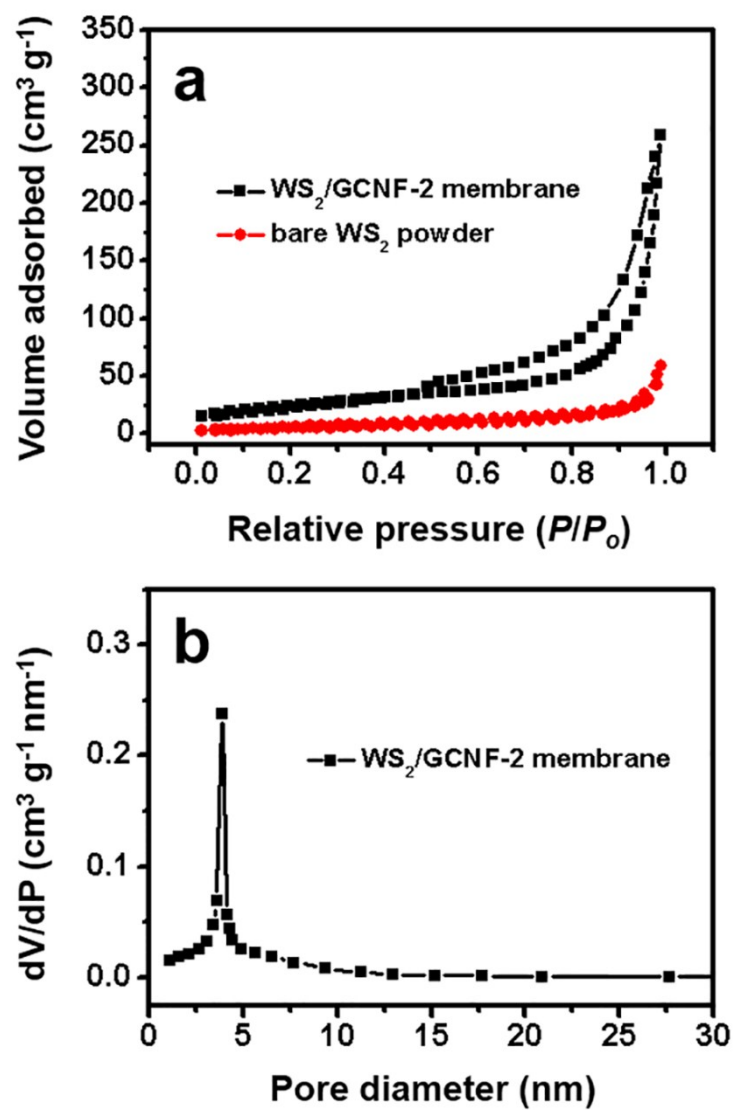

Fig. S7

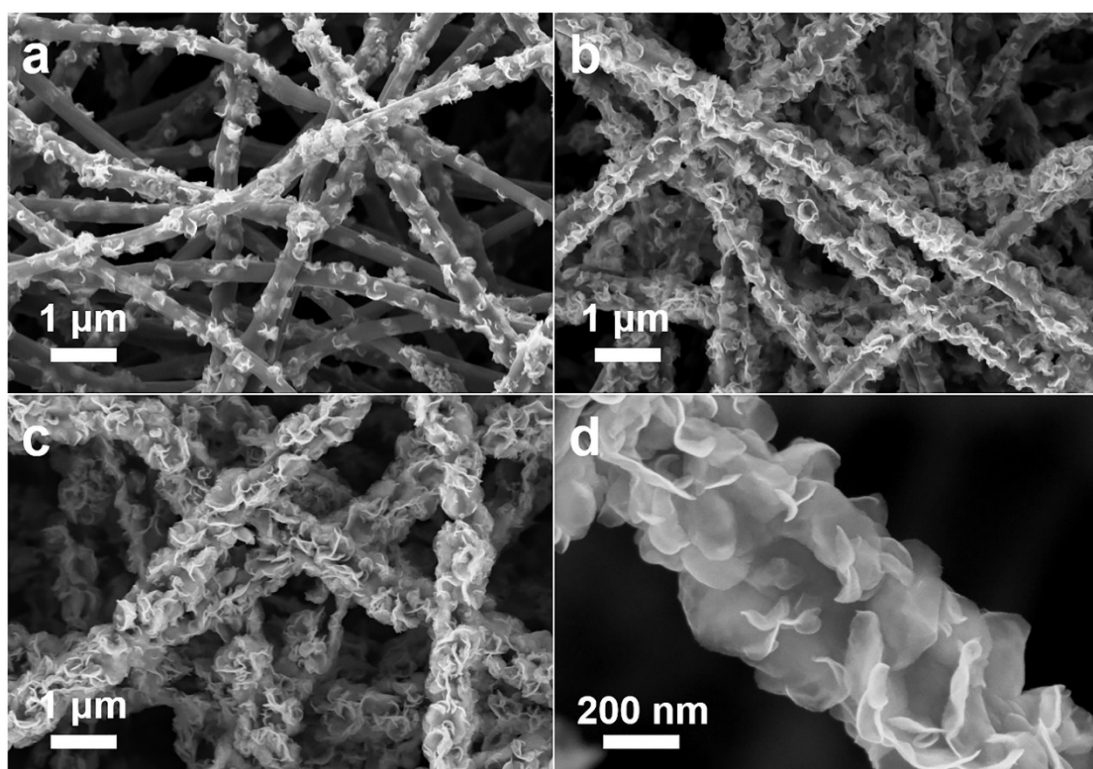

**Fig. S8**

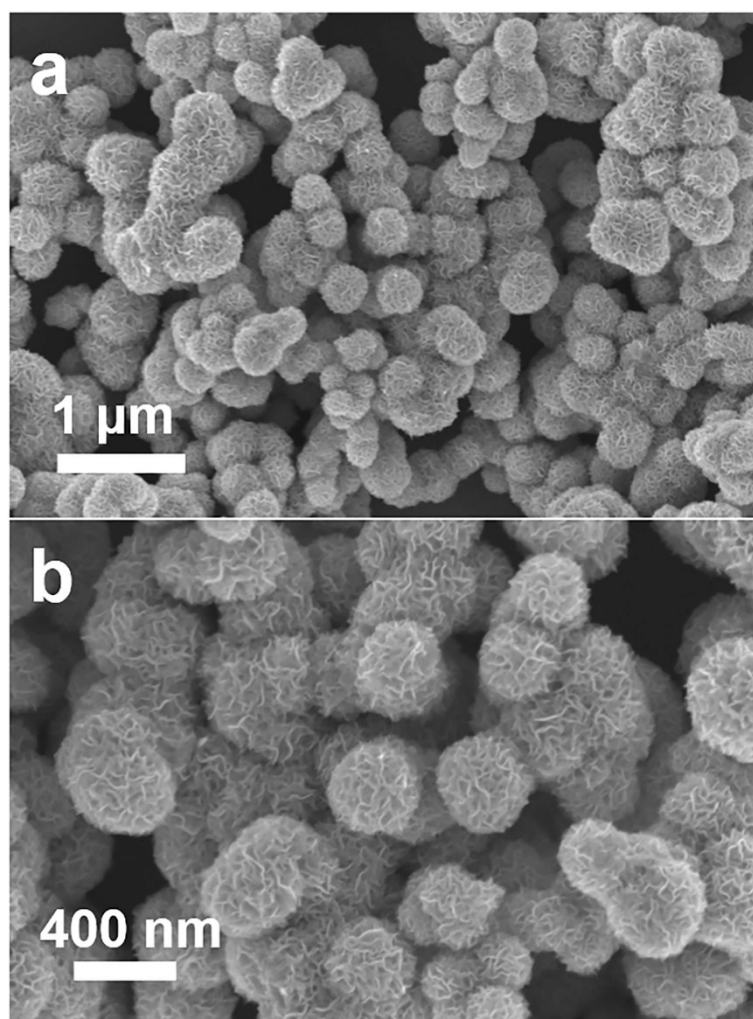

**Fig. S9**

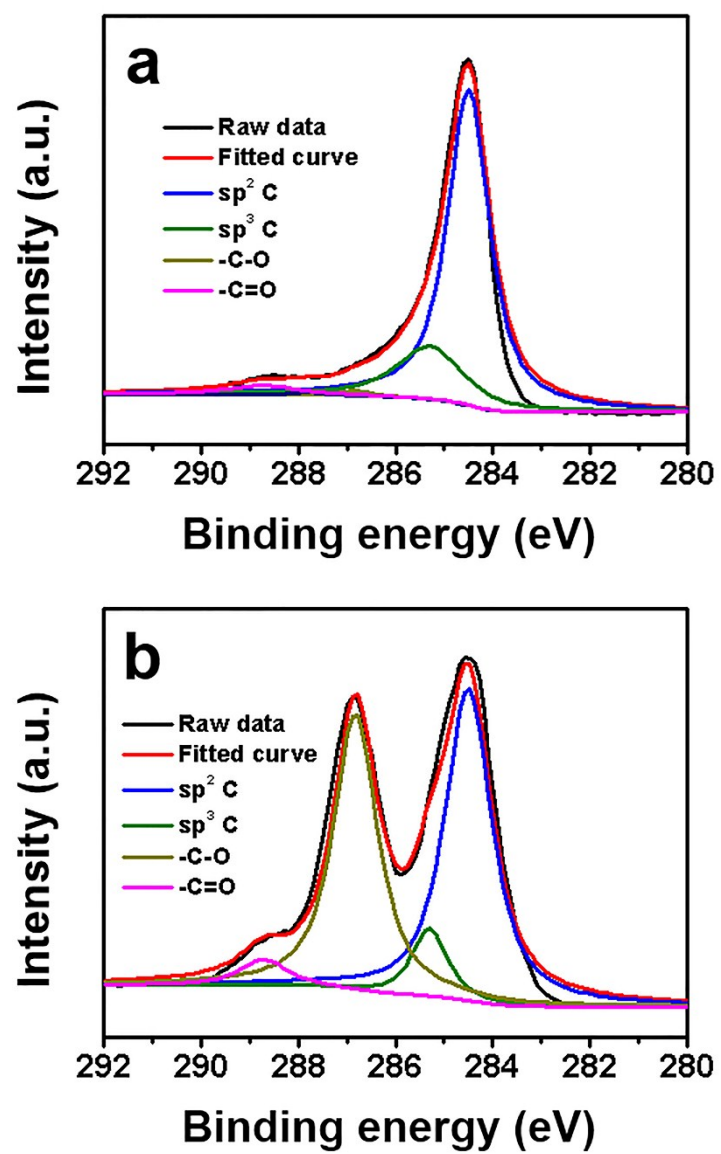

Fig. S10

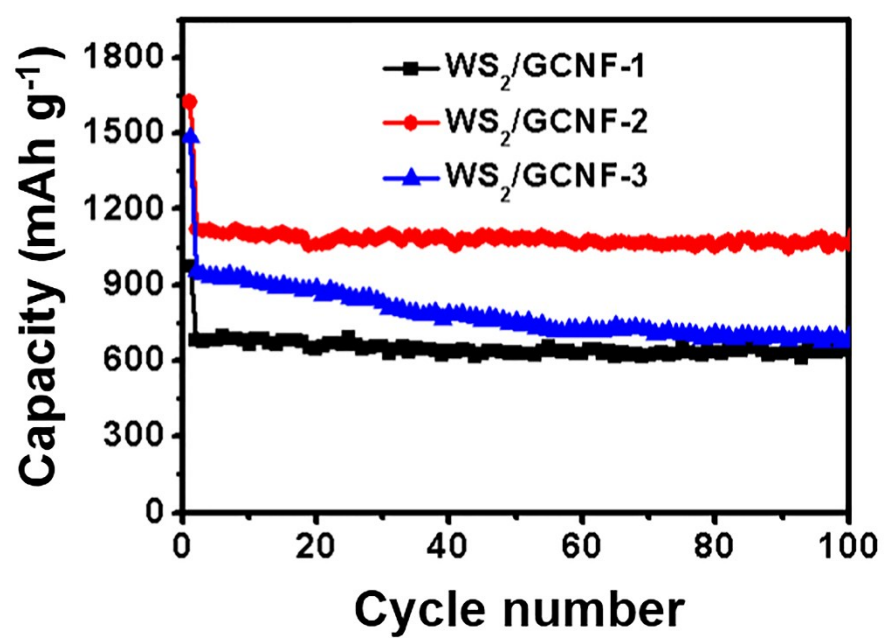

Fig. S11

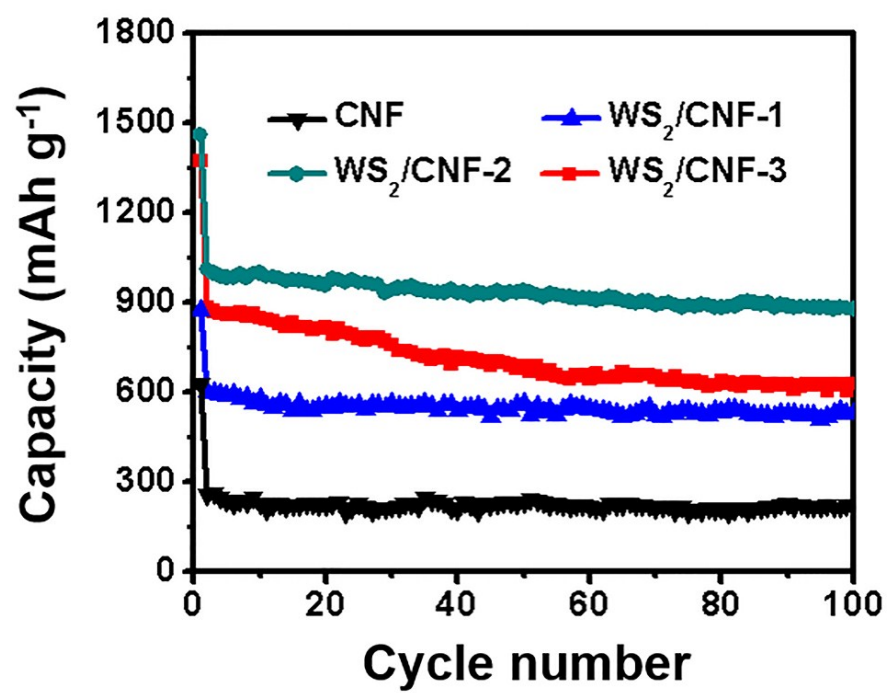

Fig. S12

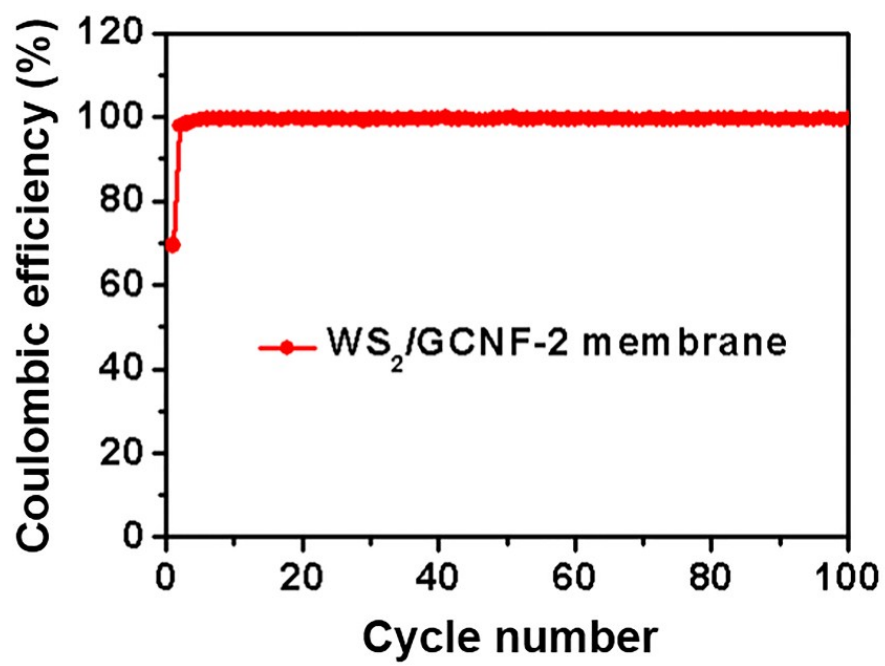

Fig. S13

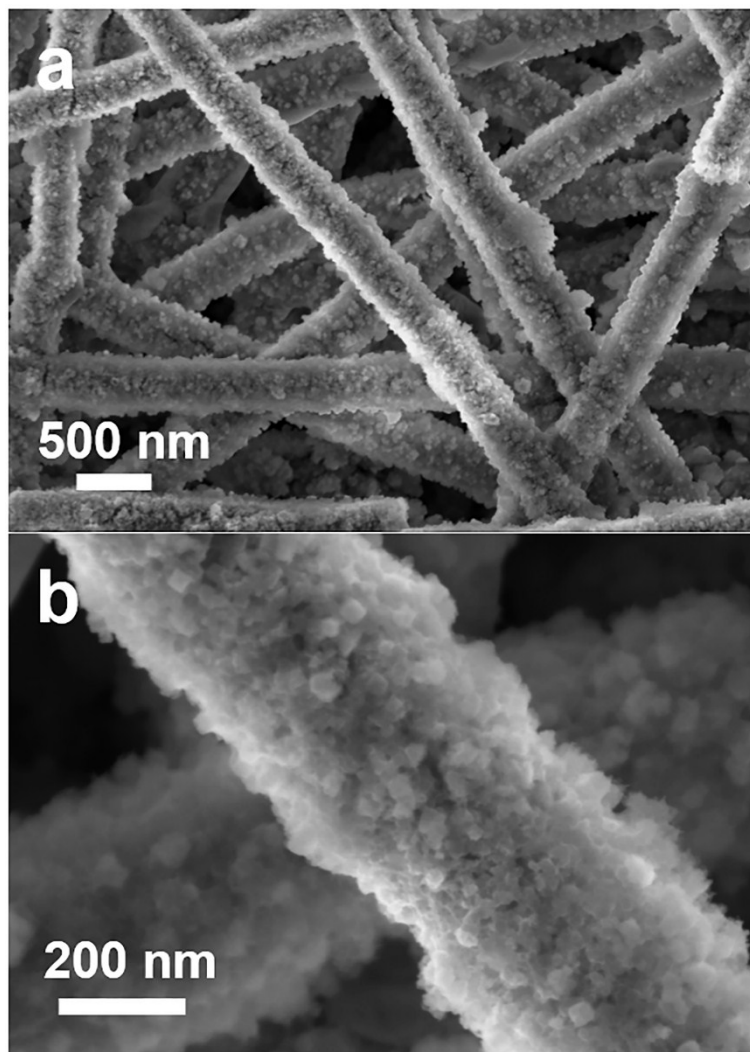

**Fig. S14**

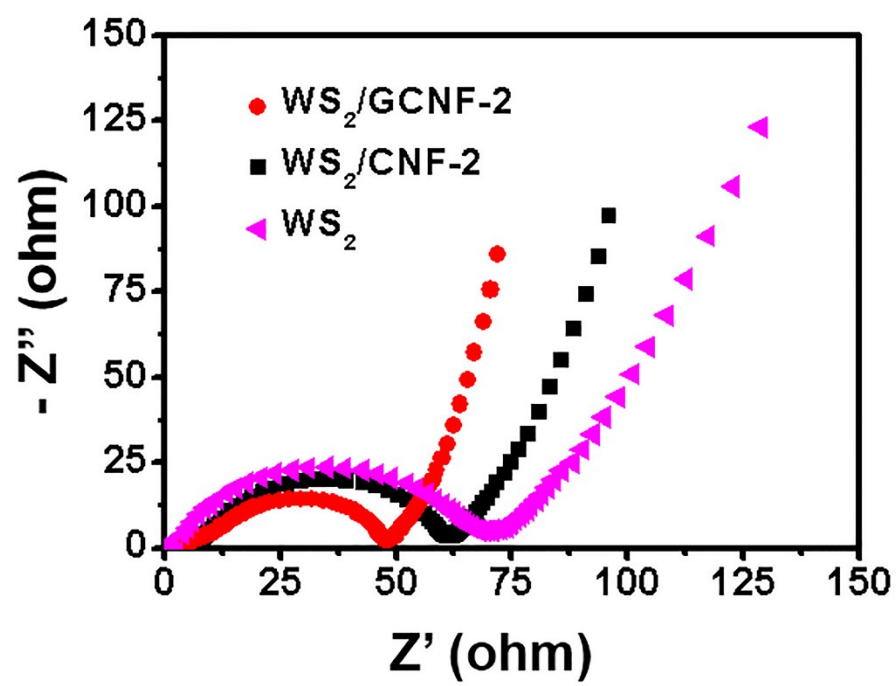

Fig. S15
